# Supplementary material
Source: PubMed Central journal article supplement (PMC4731124)
Supplement: ASN.2015010089_ASN2015010089SupplementaryData.pdf [file ASN.2015010089_ASN2015010089SupplementaryData.pdf]

## Supplementary Figure 1

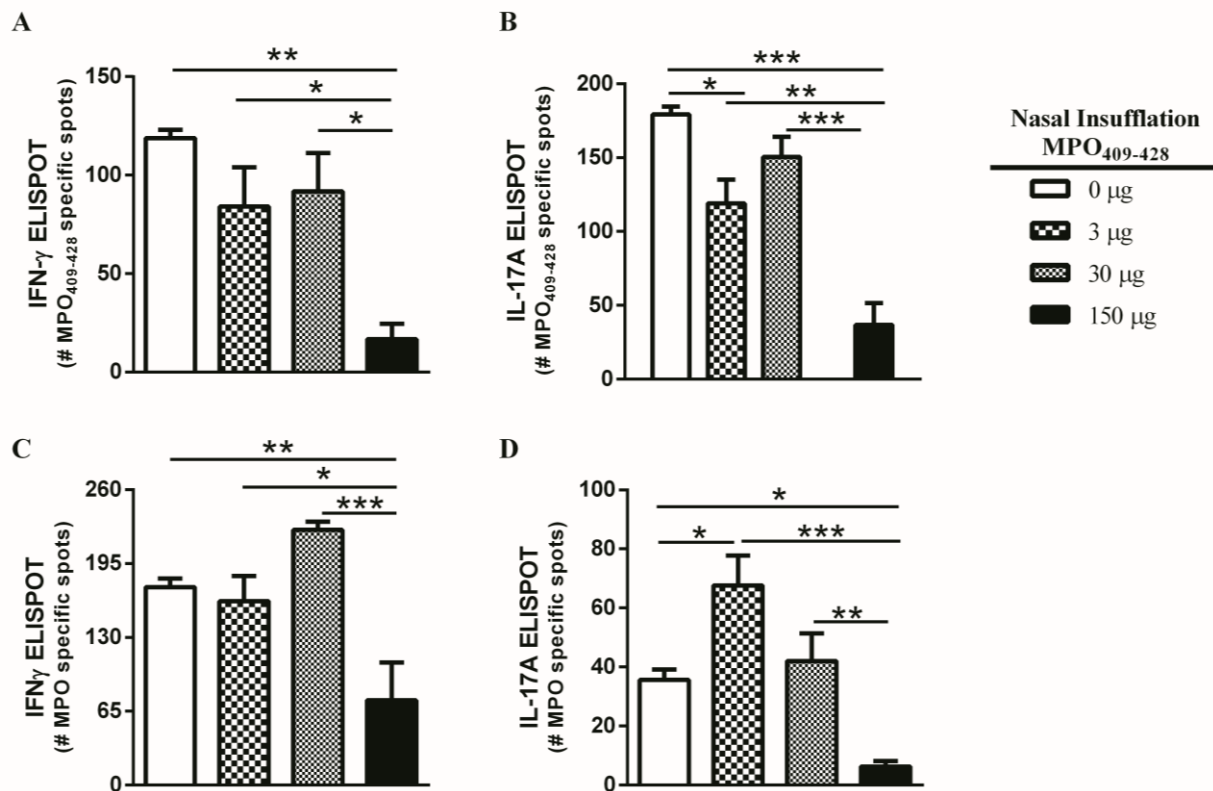

To investigate the administrative dose of MPO<sub>409-428</sub> that induces nasal tolerance, mice were administered with different dosages of MPO<sub>409-428</sub> nasally (3μg, 30μg and 150μg divided over three consecutive daily doses,  $n=4/group$ ) prior to MPO<sub>409-428</sub> immunisation. Systemic immune response was measured in draining LNs 10 days later and restimulated with either the MPO<sub>409-428</sub> or whole protein MPO *in vitro*. (A and B) Mice that received the lower cumulative doses (3μg and 30μg) MPO<sub>409-428</sub> failed to inhibit CD4<sup>+</sup> anti-MPO T cell responses, measured by IFN-γ and IL-17A recall responses against MPO<sub>409-428</sub>. Nasal administration of a cumulative dose of 150μg MPO<sub>409-428</sub> was the most effective in preventing subsequent induction of autoimmunity to MPO. (C and D) Nasal insufflation of 150μg MPO<sub>409-428</sub> reduces the frequency of IFN-γ and IL-17A producing cells against the full sequence of MPO. \* $P<0.05$ , \*\* $P<0.01$  and \*\*\* $P<0.001$ .

## Supplementary Figure 2

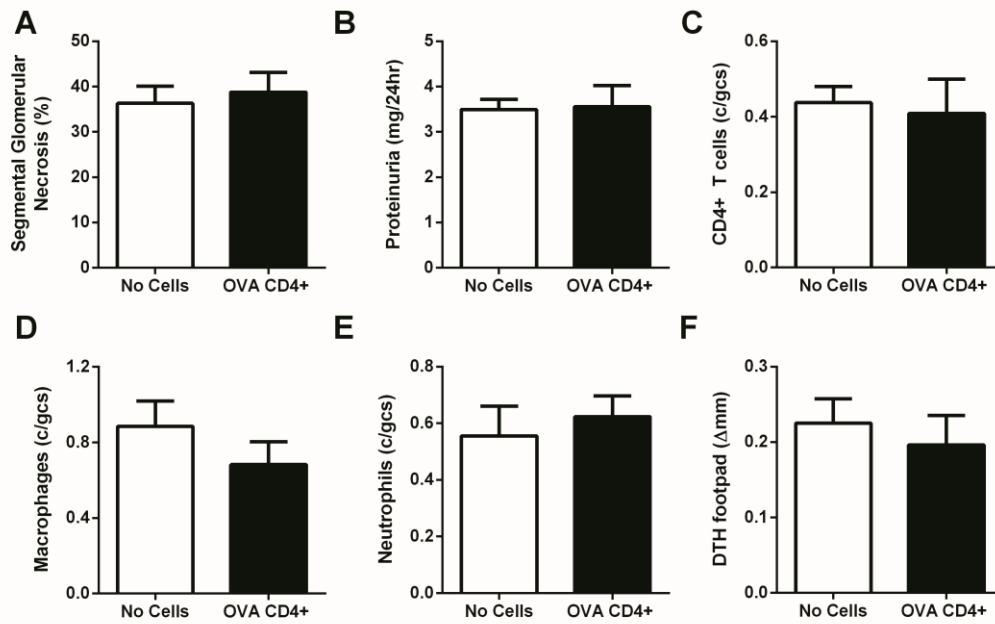

Adoptive transfer of nasally tolerized OVA<sub>323-339</sub> CD4<sup>+</sup> T cells to mice with established anti-MPO autoimmunity ( $n=12$ ) did not attenuate GN as measured by percentage segmental glomerular necrosis (A), proteinuria (B) and glomerular leukocytes (CD4<sup>+</sup> T cells, macrophages and neutrophils; C-D) compared with mice that did not receive cells ( $n=8$ ). MPO specific footpad DTH was not reduced in mice that received OVA<sub>323-339</sub> tolerized CD4<sup>+</sup> T cells (E).
